# Supplementary material for: Evaluation of the diagnostic and prognostic values of serum HSP90α in sepsis patients: a retrospective study
Source: PeerJ. 2022 Mar 10;10:e12997. doi: 10.7717/peerj.12997 (PMC8918145; doi:10.7717/peerj.12997)
Supplement: Supplemental Information 3 [file peerj-10-12997-s003.xlsx]

## Sheet: Sheet1
gender
1=male
2=female
